# Supplementary material for: Development and Validation of a Novel LC-MS/MS Method for a TDM-Guided Personalization of HSCT Conditioning with High-Dose Busulfan in Children
Source: MDPI journal article supplement (doi:10.3390/biomedicines11020530), 2023-02-11
Supplement: s1 [file s1]

## SUPPLEMENTARY MATERIALS

**Supplementary Figure S1.** Chromatographic peaks obtained in spiked sample of Busulfan 2000 ng/mL with 3 different tested chromatographic columns: 1) Thermo Scientific™ Accucore™ Polar Premium column (50 mm × 2.1 mm, i.d. 2.6 µm, Thermo Fisher Scientific, Milan, Italy), 2) Hypersil GOLD aQ ( 50 x2.1 mm, i.d. 1.9 µm, Thermo Fisher Scientific, Milan, Italy) and 3) Acquity UPLC BEH C18 (2.1 mm × 100 mm, i.d. 1.7 µm, Waters SpA, Milan, Italy).

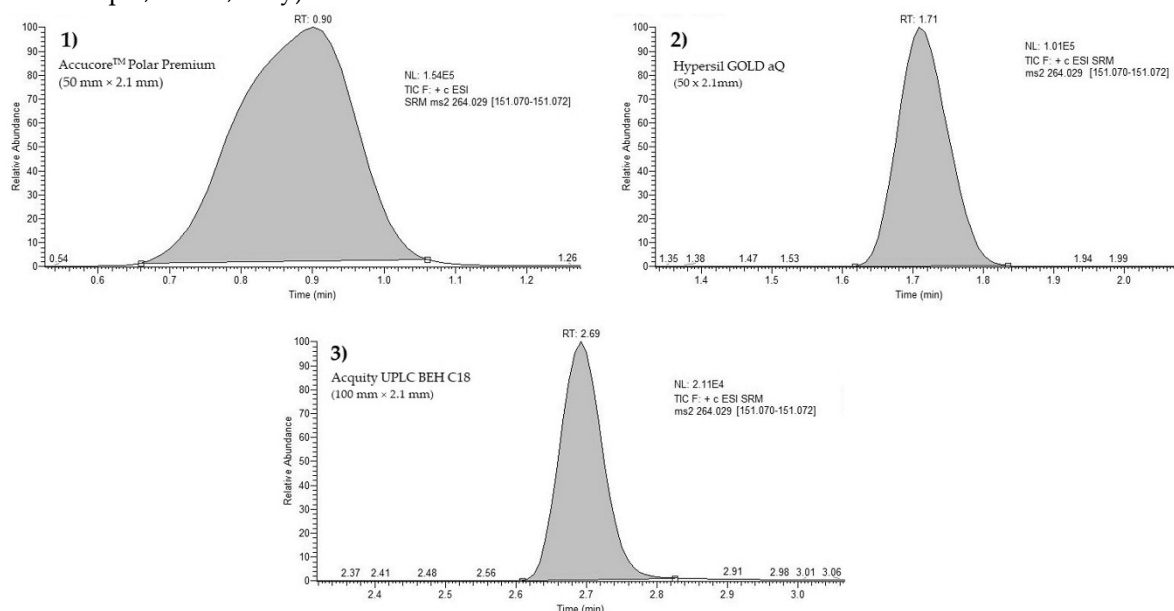

**Supplementary Table S1.** Resolution, symmetry and peak classification parameters set in the peak suitability software evaluated for chromatographic column selection.

|                                             |                                    |          |
|---------------------------------------------|------------------------------------|----------|
| <b>Resolution Parameters</b>                | Resolution Threshold (%)           | 90%      |
| <b>Simmetry Parameters</b>                  | Peak height (%)                    | 50%      |
|                                             | Symmetry threshold (%)             | 90%      |
| <b>Peak classification Parameters</b>       | Peak height (%)                    | 50%      |
|                                             | Min peak width (sec)               | 1.80 sec |
|                                             | Max peak width (sec)               | 3.60 sec |
| <b>Detect tailing</b>                       | Peak height (%)                    | 10%      |
|                                             | Failure threshold                  | 2.0      |
| <b>Detect column overload</b>               | Peak height (%)                    | 50 %     |
|                                             | Failure threshold                  | 1.5      |
| <b>Detect baseline clipping</b>             | Number of peak for noise detection | 1.0      |
| <b>Detect minimum Signal-to-noise ratio</b> | Signal-to-noise ratio              | 3        |

**Supplementary Table S2.** Results obtained from each chromatographic column tested during method development. Column 1: Thermo Scientific™ Accucore™ Polar Premium column (50 mm × 2.1 mm, i.d. 2.6 µm, Thermo Fisher Scientific, Milan, Italy). Column 2: Hypersil GOLD aQ ( 50 x2.1 mm, i.d. 1.9 µm, Thermo Fisher Scientific, Milan, Italy). Column 3: Acquity UPLC BEH C18 (2.1 mm × 100 mm, i.d. 1.7 µm, Waters SpA, Milan, Italy).

|                              | <b>Column 1</b> | <b>Column 2</b> | <b>Column 3</b> |
|------------------------------|-----------------|-----------------|-----------------|
| <b>Symmetrical</b>           | Failed          | Failed          | Passed          |
| <b>Resolution</b>            | Failed          | Passed          | Passed          |
| <b>Peak Width</b>            | Failed          | Failed          | Failed          |
| <b>Tailing</b>               | Failed          | Failed          | Passed          |
| <b>Column Overload</b>       | Failed          | Passed          | Passed          |
| <b>Baseline Clipping</b>     | Failed          | Passed          | Passed          |
| <b>Signal-to-noise ratio</b> | Failed          | Passed          | Passed          |
| <b>Concave</b>               | Failed          | Passed          | Passed          |
| <b>Saturation</b>            | Failed          | Passed          | Passed          |
